# Supplementary material
Source: PubMed Central journal article supplement (PMC3256867)
Supplement: supp_M111.291658_jbc.M111.291658-2.pdf [file supp_M111.291658_jbc.M111.291658-2.pdf]

**Supplementary Table 2. Oligonucleotide Primer Sequences Used in PCR Assays**

| <b>Gene</b> | <b>Forward</b>           | <b>Reverse</b>          |
|-------------|--------------------------|-------------------------|
| ELAVL1      | cggctggtgcatttcat        | caaacggcccaaacatct      |
| FMR1        | gggaggaagaggacaaggag     | atctgttcgggagtgatcgt    |
| HNRNPD      | ccaattgaagattcattgaagg   | ttcattcagggacttgataca   |
| PTBP1       | tcattgacctgcacaaccac     | gatggtggactggagaagg     |
| JUND        | cgattctgccctattatgttt    | ttttcttctccatttctt      |
| TOP1        | agcctcactgccctcgtgc      | acaaattccatccactgccctct |
| UBE3A       | tggaatgtttaactgcagccctca | tggccaaatgcacttcccagt   |
| GAPDH       | tgatggtacatgacaaggtgc    | acagtccatgccatcactgc    |
| B2M         | taggagggtggcaacttag      | ccaagatgtgatgtggataaga  |
