# Supplementary material
Source: PubMed Central journal article supplement (PMC3256867)
Supplement: supp_M111.291658_jbc.M111.291658-3.pdf [file supp_M111.291658_jbc.M111.291658-3.pdf]

**Supplementary Table 4. Fold Change in Gene Expression at 6hours Determined by qRT-PCR and Microarray analysis**

|               | <b>qRT-PCR</b>  | <b>Microarray</b> |
|---------------|-----------------|-------------------|
| <b>ELAVL1</b> | <b>1.7±0.7</b>  | <b>2.3±1.1</b>    |
| <b>FMR1</b>   | <b>0.70±0.3</b> | <b>0.76±0.05</b>  |
| <b>HNRNPD</b> | <b>1.7±1.5</b>  | <b>1.3±0.1</b>    |
| <b>PTBP1</b>  | <b>2.7±1.5</b>  | <b>2.8±0.4</b>    |
